# Supplementary material for: Simultaneous 6300 Å airglow and radar observations of ionospheric irregularities and dynamics at the geomagnetic equator
Source: Copernicus journal article supplement (doi:10.5194/angeo-36-473-2018), 2018-03-22
Supplement: Supplementary file 1 [file angeo-36-473-2018-supplement.zip]

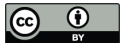

## *Supplement of*

# **Simultaneous 6300 Å airglow and radar observations of ionospheric irregularities and dynamics at the geomagnetic equator**

**Dustin A. Hickey et al.**

*Correspondence to:* Dustin A. Hickey ([dahickey@bu.edu](mailto:dahickey@bu.edu))

- [angeo-36-473-2018-supplement-title-page.pdf](#)
- [Apr0314.mp4](#)
- [Apr0314\\_jica.mp4](#)
- [Apr0414.mp4](#)
- [Oct2914.mp4](#)

The copyright of individual parts of the supplement might differ from the CC BY 4.0 License.
